# Supplementary material
Source: PubMed Central journal article supplement (PMC3241767)
Supplement: 1115231108_pnas.201115231SI.pdf [file 1115231108_pnas.201115231SI.pdf]

# Supporting Information

Majumdar et al. 10.1073/pnas.1115231108

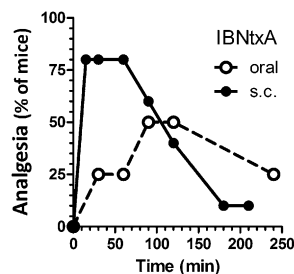

**Fig. S1.** Time course of oral and s.c. IBNtxA analgesia. Groups of mice received IBNtxA s.c. (0.75 mg/kg s.c.;  $n = 20$ ) or orally (5 mg/kg s.c.;  $n = 8$ ) by gavage and were tested for analgesia at the indicated times.

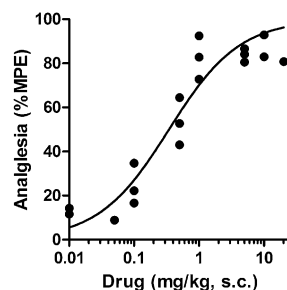

**Fig. S2.** IBNtxA analgesia in WT mice. Three independent determinations of the cumulative dose–response curves were performed on groups of mice ( $n = 10$ ) for IBNtxA analgesia in the tail-flick assay. The means of each dose in each determination were determined as percentage maximal possible effect (%MPE) [(observed latency – baseline latency)/(maximal latency – baseline latency)]. Each value is shown for each of the three independent determinations.

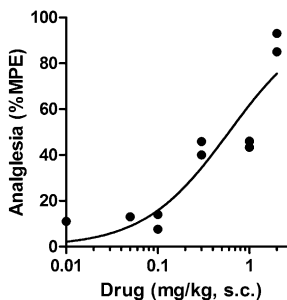

**Fig. S3.** IBNtxA hot plate assay analgesia in WT mice. Cumulative dose–response curves were determined in the 55 °C hot plate assay for two groups of mice ( $n = 8$ ) tested independently. Results were evaluated as %MPE [(observed latency – baseline latency)/(maximal latency – baseline latency)] and shown as the average of each group ( $n = 8$ ).  $ED_{50} = 0.6$  mg/kg s.c.

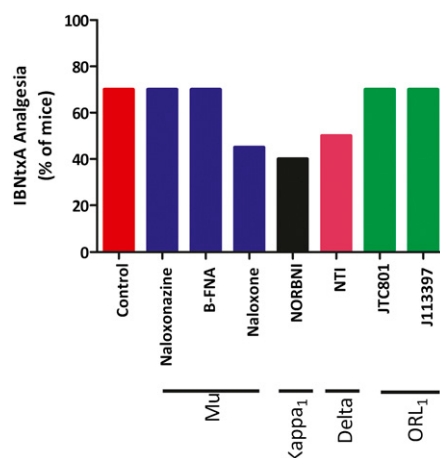

**Fig. S4.** Sensitivity of IBNTxA analgesia to opioid antagonists. Groups of mice ( $n \geq 10$ ) received IBNTxA (0.75 mg/kg s.c.) and the indicated antagonist. Naloxonazine (35 mg/kg s.c.) and  $\beta$ -funaltrexamine ( $\beta$ -FNA; 40 mg/kg s.c.) were administered at 24 h before agonist testing. Naloxone (10 mg/kg s.c.), norbinaltorphimine (norBNI; 10 mg/kg s.c.), naltrindole (NTI; 20 mg/kg s.c.), JTC801 (30 mg/kg s.c.), and J113397 (30 mg/kg s.c.) were administered immediately before IBNTxA. All analgesia testing was performed 30 min after IBNTxA administration.

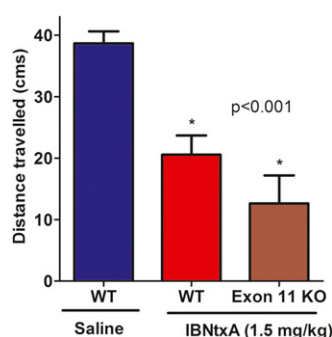

**Fig. S5.** IBNtxA inhibition of gastrointestinal transit in WT and exon 11 MOR-1 KO mice. Groups of mice ( $n = 10$ ) received either saline (control) or IBNtxA (1.5 mg/kg s.c.) and followed by a charcoal meal by gavage. Animals were killed 30 min later, and the distance traveled by charcoal was measured. IBNtxA decreased transit in WT mice and in the exon 11 MOR-1 KO mouse compared with untreated control WT mice ( $P < 0.001$ ). The decrease in transit for IBNtxA in the exon 11 MOR-1 KO mouse was not significantly different from the WT mice, contrasting with its loss of analgesic activity in the exon 11 MOR-1 KO mice.

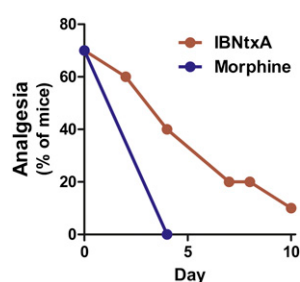

**Fig. 56.** Effect of chronic dosing on morphine and IBNtxA analgesia. Groups of mice ( $n \geq 20$ ) were treated with either morphine (6 mg/kg s.c.) or IBNtxA (1 mg/kg s.c.) twice daily for 5 or 10 d, respectively. Tail-flick latencies were determined before and 30 min after each injection.

**Table S1. <sup>125</sup>I-BNTxA binding in triple-KO and WT mice brain membranes with and without blockers**

| Mice                 | $K_D$ , nM      | $B_{max}$ , fmol/mg of protein |
|----------------------|-----------------|--------------------------------|
| WT C57               | $0.12 \pm 0.03$ | $284 \pm 8.96$                 |
| Triple-KO            | $0.16 \pm 0.04$ | $61 \pm 1.6$                   |
| WT C57 with blockers | $0.12 \pm 0.04$ | $47 \pm 8.4$                   |

Mouse brain membranes were prepared as described in *Materials and Methods*. Saturation studies were carried out with  $^{125}\text{I}$ -BNTx alone (WT C57 and triple-KO) or in WT C57 membranes in the presence of mu [ $\text{D-Phe-Cys-Tyr-D-Trp-Arg-Thr-Pen-Thr-NH}_2$  (CTAP), 1  $\mu\text{M}$ ], kappa $_1$  (U50,488H, 1  $\mu\text{M}$ ), and delta [ $\text{D-Pen}^2$ ,  $\text{D-Pen}^5$ ]enkephalin (DPDPE); 1  $\mu\text{M}$ ] blockers. Results are the means  $\pm$  SEM of three independent determinations.
